# Supplementary material for: National Monitoring for Menstrual Health and Hygiene: Is the Type of Menstrual Material Used Indicative of Needs Across 10 Countries?
Source: PubMed Central journal article supplement (PMC7215803; doi:10.3390/ijerph17082633), 2020-04-12
Supplement: ijerph-17-02633-s001.pdf [file ijerph-17-02633-s001.pdf]

## Supplementary Materials

**Table S1.** Reported menstrual material needs by menstrual material use (categorized using both single- and multi-response variables) for each survey

|                                            | Uganda |           |                  |      | Kenya        |           |                  |      | Ethiopia |           |                  |      |
|--------------------------------------------|--------|-----------|------------------|------|--------------|-----------|------------------|------|----------|-----------|------------------|------|
|                                            | None   | Absorbent | Money/<br>vendor | N    | None         | Absorbent | Money/<br>vendor | N    | None     | Absorbent | Money/<br>vendor | N    |
| <b>Menstrual Material (Grouped)</b>        |        |           |                  |      |              |           |                  |      |          |           |                  |      |
| Pads only                                  | 60.35  | 26.07     | 13.58            | 1399 | 64.51        | 17.54     | 17.95            | 3376 | 68.36    | 19.94     | 11.71            | 1616 |
| Cloth only                                 | 29.71  | 56.11     | 14.19            | 824  | 20.53        | 62.04     | 17.43            | 392  | 29.39    | 57.26     | 13.35            | 1836 |
| Cotton wool only                           | 41.94  | 37.09     | 20.97            | 43   | 54.51        | 24.79     | 20.7             | 110  | 59.72    | 24.98     | 15.31            | 56   |
| Pads, cloth, cotton wool                   | 37.46  | 45.43     | 17.11            | 339  | 36.68        | 36.13     | 27.19            | 339  | 38.51    | 46.32     | 15.17            | 337  |
| Pads, cloth, cotton wool, other            | 24.81  | 54.82     | 20.37            | 31   | 27.98        | 37.55     | 34.48            | 98   | 34.37    | 56.88     | 8.74             | 120  |
| Other <sup>1</sup>                         | 26.49  | 58.43     | 15.08            | 54   | 47.08        | 47.89     | 5.03             | 42   | 53.81    | 33.39     | 12.8             | 791  |
| <b>Menstrual Material (multi-response)</b> |        |           |                  |      |              |           |                  |      |          |           |                  |      |
| Pads                                       | 55.98  | 29.9      | 14.13            | 1727 | 61.74        | 19.02     | 19.25            | 3766 | 64.84    | 23.33     | 11.83            | 1910 |
| Cloth                                      | 30.72  | 53.61     | 15.68            | 1131 | 22.15        | 58.69     | 19.16            | 617  | 30.21    | 56.35     | 13.44            | 2262 |
| Cotton wool                                | 43.65  | 40.03     | 16.32            | 137  | 43.39        | 26.44     | 30.17            | 319  | 41.88    | 37.2      | 20.93            | 146  |
| Paper                                      | 20.68  | 52.09     | 27.23            | 17   | 37.9         | 28.92     | 33.19            | 97   | 0        | 53.46     | 46.54            | 9    |
| All others <sup>2</sup>                    | 24.97  | 60.2      | 14.83            | 75   | 23.44        | 64.3      | 12.26            | 45   | 51.77    | 36.31     | 11.92            | 903  |
|                                            | Ghana  |           |                  |      | Burkina Faso |           |                  |      | Niger    |           |                  |      |
| <b>Menstrual Material (grouped)</b>        |        |           |                  |      |              |           |                  |      |          |           |                  |      |
| Pads only                                  | 80.61  | 9.03      | 10.36            | 2344 | 63.25        | 28.65     | 8.1              | 290  | 66.74    | 20.03     | 13.23            | 185  |
| Cloth only                                 | 58.14  | 25.85     | 16.01            | 245  | 31.39        | 47.73     | 20.89            | 1244 | 51.26    | 25.37     | 23.37            | 1126 |
| Cotton wool only                           | 59.15  | 40.85     | 0                | 8    | 57.03        | 26.96     | 16.01            | 279  | 80.52    | 9.41      | 10.07            | 231  |
| Pads, cloth, cotton wool                   | 45.53  | 18.04     | 36.44            | 96   | 33.86        | 41.65     | 24.49            | 87   | 43.36    | 22.08     | 34.56            | 35   |
| Pads, cloth, cotton wool, other            | 60.59  | 16.39     | 23.02            | 98   | 31.23        | 51.08     | 17.69            | 39   | 24.56    | 56.08     | 19.36            | 48   |
| Other <sup>1</sup>                         | 62.91  | 32.52     | 4.57             | 44   | 53.08        | 39.88     | 7.04             | 198  | 70.2     | 24.55     | 5.26             | 272  |

|                                            | Ghana |           |                  |                        | Burkina Faso |           |                       |                      | Niger |           |                  |      |
|--------------------------------------------|-------|-----------|------------------|------------------------|--------------|-----------|-----------------------|----------------------|-------|-----------|------------------|------|
|                                            | None  | Absorbent | Money/<br>vendor | N                      | None         | Absorbent | Money<br>or<br>vendor | N                    | None  | Absorbent | Money/<br>vendor | N    |
| <b>Menstrual Material (multi-response)</b> |       |           |                  |                        |              |           |                       |                      |       |           |                  |      |
| Pad/tampon                                 | 78.54 | 9.67      | 11.79            | 2533                   | 58.15        | 31.77     | 10.08                 | 352                  | 65.97 | 19.24     | 14.79            | 203  |
| Cloth                                      | 52.78 | 24.49     | 22.73            | 339                    | 31.24        | 47.75     | 21.01                 | 1352                 | 49.92 | 26.44     | 23.64            | 1200 |
| Cotton wool                                | 80.27 | 11.82     | 7.91             | 28                     | 55.01        | 27.13     | 17.86                 | 326                  | 75.55 | 11.88     | 12.57            | 262  |
| Paper                                      | 62.45 | 14.31     | 23.23            | 93                     | 49.69        | 43.63     | 6.68                  | 84                   | 24.87 | 75.13     | 0                | 4    |
| All others <sup>2</sup>                    | 58.67 | 35.33     | 6.01             | 49                     | 49.35        | 40.68     | 9.97                  | 153                  | 63.79 | 28.74     | 7.47             | 316  |
| <b>Lagos, Nigeria</b>                      |       |           |                  | <b>Kaduna, Nigeria</b> |              |           |                       | <b>Kinshasa, DRC</b> |       |           |                  |      |
| <b>Menstrual Material (grouped)</b>        |       |           |                  |                        |              |           |                       |                      |       |           |                  |      |
| Pads only                                  | 96.47 | 2.17      | 1.36             | 867                    | 77.96        | 6.66      | 15.38                 | 542                  | 53.01 | 31.45     | 15.54            | 1525 |
| Cloth Only                                 | 76.48 | 14.58     | 8.94             | 46                     | 61.03        | 15.95     | 23.02                 | 1090                 | 36.6  | 39.94     | 23.47            | 75   |
| Cotton wool only                           | 76.47 | 23.53     | 0                | 14                     | 70.62        | 12.93     | 16.45                 | 6                    | 52.41 | 44.67     | 2.93             | 17   |
| Pads, cloth, cotton wool                   | 83.18 | 3.46      | 13.36            | 29                     | 58.04        | 13.38     | 28.58                 | 176                  | 46.77 | 36        | 17.23            | 40   |
| Pads, cloth, cotton wool, other            | 94.2  | 4.42      | 1.38             | 110                    | 56.8         | 21.4      | 21.8                  | 88                   | 16.21 | 30.36     | 53.43            | 230  |
| Other <sup>1</sup>                         | 93.18 | 4.7       | 2.12             | 94                     | 50.97        | 33        | 16.03                 | 67                   | 36.19 | 47.74     | 16.07            | 192  |
| <b>Menstrual Material (multi-response)</b> |       |           |                  |                        |              |           |                       |                      |       |           |                  |      |
| Pad/tampon                                 | 96.04 | 2.23      | 1.74             | 994                    | 73.59        | 8.37      | 18.04                 | 743                  | 33.75 | 43.78     | 22.47            | 418  |
| Cloth                                      | 76.62 | 13.58     | 9.8              | 76                     | 59.7         | 16.23     | 24.07                 | 1327                 | 55.71 | 29.48     | 14.82            | 448  |
| Cotton wool                                | 86.93 | 10.99     | 2.08             | 29                     | 82.12        | 12.35     | 5.53                  | 24                   | 44.78 | 42.61     | 12.6             | 189  |
| Paper                                      | 94.4  | 3.82      | 1.78             | 197                    | 59.74        | 26.09     | 14.17                 | 93                   | 50.87 | 28.91     | 20.23            | 278  |
| All others <sup>2</sup>                    | 74.45 | 25.55     | 0                | 7                      | 46.69        | 26.7      | 26.61                 | 63                   | 43.16 | 35.63     | 21.21            | 116  |

|                                            | Kongo Central, DRC |           |                  |      | Indonesia |           |                       |      | Rajasthan, India |           |                  |      |
|--------------------------------------------|--------------------|-----------|------------------|------|-----------|-----------|-----------------------|------|------------------|-----------|------------------|------|
|                                            | None               | Absorbent | Money/<br>vendor | N    | None      | Absorbent | Money<br>or<br>vendor | N    | None             | Absorbent | Money/<br>vendor | N    |
| <b>Menstrual Material (grouped)</b>        |                    |           |                  |      |           |           |                       |      |                  |           |                  |      |
| Pads only                                  | 35.67              | 37.74     | 26.59            | 227  | 92.23     | 5.46      | 2.31                  | 7051 | 76.21            | 7.28      | 16.51            | 1960 |
| Cloth only                                 | 54.66              | 29.41     | 15.93            | 327  | 89.29     | 7.45      | 3.26                  | 585  | 47.16            | 21.45     | 31.39            | 2456 |
| Cotton wool only                           | 41.57              | 38.32     | 20.11            | 75   | 100.00    | 0         | 0                     | 6    | 89.27            | 6.8       | 3.93             | 13   |
| Pads, cloth, cotton wool                   | 42.74              | 48.72     | 8.53             | 92   | 82.26     | 14.23     | 3.51                  | 234  | 57.2             | 12.97     | 29.83            | 519  |
| Pads, cloth, cotton wool, other            | 39.77              | 41.03     | 19.2             | 171  | 93.49     | 6.51      | 0                     | 13   | 56.39            | 28.48     | 15.13            | 12   |
| Other <sup>1</sup>                         | 54.44              | 22.98     | 22.58            | 211  | 90.46     | 5.15      | 4.39                  | 145  | 64.57            | 20.41     | 15.03            | 51   |
| <b>Menstrual Material (multi-response)</b> |                    |           |                  |      |           |           |                       |      |                  |           |                  |      |
| Pad/tampon                                 | 48.2               | 31.4      | 20.4             | 1778 | 91.91     | 5.75      | 2.34                  | 7297 | 72.52            | 8.42      | 19.05            | 2469 |
| Cloth                                      | 28.54              | 41.39     | 30.07            | 154  | 87.25     | 9.44      | 3.31                  | 824  | 48.85            | 20.06     | 31.08            | 2978 |
| Cotton wool                                | 54.63              | 33.33     | 12.05            | 47   | 100       | 0         | 0                     | 19   | 58.6             | 9.3       | 32.11            | 70   |
| Paper                                      | 18.63              | 37.04     | 44.33            | 317  | 100       | 0         | 0                     | 12   | 100              | 0         | 0                | 5    |
| All others <sup>2</sup>                    | 46.33              | 41.49     | 12.18            | 110  | 89.92     | 5.71      | 4.36                  | 146  | 60.24            | 23.6      | 16.17            | 59   |

<sup>1</sup> Includes foam, natural materials, bucket, paper, and "other" from the original question, or any combination of those materials, and no materials

<sup>2</sup> Includes foam, natural materials, no materials, bucket, and responses originally recorded as other
